# Supplementary material for: Comparative Outcomes of Open Radical Cystectomy vs. Robot-Assisted Approaches with Intracorporeal and Extracorporeal Urinary Diversion: A Meta-Analysis and Network Meta-Analysis of Perioperative and Quality of Life Outcomes
Source: MDPI journal article supplement (doi:10.3390/jcm13082421), 2024-04-21

## Supplementary Material

Supplementary Table S1. Search Strategy

|                                           |                                                                                                                                                                                                                                                                                                                                                                                                                                                                                                                                                                                                                                                                                                                                                                                                                                                                                                                                                                                                                                                                                                                                                                                                                                                                                                                                    |
|-------------------------------------------|------------------------------------------------------------------------------------------------------------------------------------------------------------------------------------------------------------------------------------------------------------------------------------------------------------------------------------------------------------------------------------------------------------------------------------------------------------------------------------------------------------------------------------------------------------------------------------------------------------------------------------------------------------------------------------------------------------------------------------------------------------------------------------------------------------------------------------------------------------------------------------------------------------------------------------------------------------------------------------------------------------------------------------------------------------------------------------------------------------------------------------------------------------------------------------------------------------------------------------------------------------------------------------------------------------------------------------|
| <p>MEDLINE<br/>(PubMed)<br/>(2023-04)</p> | <ol style="list-style-type: none"> <li>1. Robot* [OR]</li> <li>2. Robotical [OR]</li> <li>3. Robotic [OR]</li> <li>4. Robot Assisted [OR]</li> <li>5. Robot-Assisted [OR]</li> <li>6. Minimally invasive [OR]</li> </ol> <p>[AND]</p> <ol style="list-style-type: none"> <li>7. Open [OR]</li> <li>8. Conventional [OR]</li> <li>9. Classic [OR]</li> <li>10. Classical [OR]</li> <li>11. Traditional [OR]</li> </ol> <p>[AND]</p> <ol style="list-style-type: none"> <li>12. Cystectomy [OR]</li> <li>13. Radical bladder [OR]</li> <li>14. Cystoprostatectomy [OR]</li> <li>15. Bladder surgery [OR]</li> <li>16. Bladder Removal [OR]</li> </ol> <p>[AND]</p> <ol style="list-style-type: none"> <li>17. Random Allocation</li> <li>18. random allocation</li> <li>19. "control* clinic* trial"</li> <li>20. "control* trial"</li> <li>21. RCT</li> <li>22. random*</li> <li>23. Compar*</li> <li>24. Trial</li> </ol> <p>"(Robot* OR Robotical OR Robotic OR Robot Assisted OR Robot-Assisted OR Minimally invasive) AND (Open OR Conventional OR Classic OR Classical OR Traditional) AND (Cystectomy OR Radical bladder OR Cystoprostatectomy OR Bladder surgery OR Bladder Removal) AND (Random Allocation OR random allocation OR 'control* clinic* trial' OR 'control* trial' OR RCT OR random* OR Compar* OR Trial)"</p> |
| <p>Web Of<br/>Science<br/>(2023-04)</p>   | <ol style="list-style-type: none"> <li>1. Robot* [OR]</li> <li>2. Robotical [OR]</li> <li>3. Robotic [OR]</li> <li>4. Robot Assisted [OR]</li> <li>5. Robot-Assisted [OR]</li> <li>6. Minimally invasive [OR]</li> </ol>                                                                                                                                                                                                                                                                                                                                                                                                                                                                                                                                                                                                                                                                                                                                                                                                                                                                                                                                                                                                                                                                                                           |

|  |                                                                                                                                                                                                                                                                                                                                                                                                                                                                                                                                                                                                                                                                                                                                                                                                                                                                                                                                                                                                                                                                                                              |
|--|--------------------------------------------------------------------------------------------------------------------------------------------------------------------------------------------------------------------------------------------------------------------------------------------------------------------------------------------------------------------------------------------------------------------------------------------------------------------------------------------------------------------------------------------------------------------------------------------------------------------------------------------------------------------------------------------------------------------------------------------------------------------------------------------------------------------------------------------------------------------------------------------------------------------------------------------------------------------------------------------------------------------------------------------------------------------------------------------------------------|
|  | <p>[AND]</p> <ol style="list-style-type: none"> <li>7. Open [OR]</li> <li>8. Conventional [OR]</li> <li>9. Classic [OR]</li> <li>10. Classical [OR]</li> <li>11. Traditional [OR]</li> </ol> <p>[AND]</p> <ol style="list-style-type: none"> <li>12. Cystectomy [OR]</li> <li>13. Radical bladder [OR]</li> <li>14. Cystoprostatectomy [OR]</li> <li>15. Bladder surgery [OR]</li> <li>16. Bladder Removal [OR]</li> </ol> <p>[AND]</p> <ol style="list-style-type: none"> <li>17. Random Allocation</li> <li>18. random allocation</li> <li>19. "control* clinic* trial"</li> <li>20. "control* trial"</li> <li>21. RCT</li> <li>22. random*</li> <li>23. Compar*</li> <li>24. Trial</li> </ol> <p>TS=((Robot* OR Robotical OR Robotic OR Robot Assisted OR Robot-Assisted OR Minimally invasive) AND (Open OR Conventional OR Classic OR Classical OR Traditional) AND (Cystectomy OR Radical bladder OR Cystoprostatectomy OR Bladder surgery OR Bladder Removal) AND (Random Allocation OR random allocation OR 'control* clinic* trial' OR 'control* trial' OR RCT OR random* OR Compar* OR Trial))</p> |
|--|--------------------------------------------------------------------------------------------------------------------------------------------------------------------------------------------------------------------------------------------------------------------------------------------------------------------------------------------------------------------------------------------------------------------------------------------------------------------------------------------------------------------------------------------------------------------------------------------------------------------------------------------------------------------------------------------------------------------------------------------------------------------------------------------------------------------------------------------------------------------------------------------------------------------------------------------------------------------------------------------------------------------------------------------------------------------------------------------------------------|

|                     |                                                                                                                                                                                                                                                                                                                                                                                                                                    |
|---------------------|------------------------------------------------------------------------------------------------------------------------------------------------------------------------------------------------------------------------------------------------------------------------------------------------------------------------------------------------------------------------------------------------------------------------------------|
| Scopus<br>(2023-04) | <ol style="list-style-type: none"> <li>1. Robot* [OR]</li> <li>2. Robotical [OR]</li> <li>3. Robotic [OR]</li> <li>4. Robot Assisted [OR]</li> <li>5. Robot-Assisted [OR]</li> <li>6. Minimally invasive [OR]</li> </ol> <p>[AND]</p> <ol style="list-style-type: none"> <li>7. Open [OR]</li> <li>8. Conventional [OR]</li> <li>9. Classic [OR]</li> <li>10. Classical [OR]</li> <li>11. Traditional [OR]</li> </ol> <p>[AND]</p> |
|---------------------|------------------------------------------------------------------------------------------------------------------------------------------------------------------------------------------------------------------------------------------------------------------------------------------------------------------------------------------------------------------------------------------------------------------------------------|

|                               |                                                                                                                                                                                                                                                                                                                                                                                                                                                                                                                                                                                                                                                                                                                                                                                                                                                                                                                                                                                                                                                                                                                                                                                                                                                                 |
|-------------------------------|-----------------------------------------------------------------------------------------------------------------------------------------------------------------------------------------------------------------------------------------------------------------------------------------------------------------------------------------------------------------------------------------------------------------------------------------------------------------------------------------------------------------------------------------------------------------------------------------------------------------------------------------------------------------------------------------------------------------------------------------------------------------------------------------------------------------------------------------------------------------------------------------------------------------------------------------------------------------------------------------------------------------------------------------------------------------------------------------------------------------------------------------------------------------------------------------------------------------------------------------------------------------|
|                               | <p>12. Cystectomy [OR]<br/> 13. Radical bladder [OR]<br/> 14. Cystoprostatectomy [OR]<br/> 15. Bladder surgery [OR]<br/> 16. Bladder Removal [OR]</p> <p>[AND]</p> <p>17. Random Allocation<br/> 18. random allocation<br/> 19. "control* clinic* trial"<br/> 20. "control* trial"<br/> 21. RCT<br/> 22. random*<br/> 23. Compar*<br/> 24. Trial</p> <p>( TITLE-ABS-KEY ( "Robot*" ) OR TITLE-ABS-KEY ( "Robotical" ) OR TITLE-ABS-KEY ( "Robotic" ) OR TITLE-ABS-KEY ( "Robot Assisted" ) OR TITLE-ABS-KEY ( "Robot-Assisted" ) OR TITLE-ABS-KEY ( "Minimally invasive" ) ) AND ( TITLE-ABS-KEY ( "Open" ) OR TITLE-ABS-KEY ( "Conventional" ) OR TITLE-ABS-KEY ( "Classic" ) OR TITLE-ABS-KEY ( "Classical" ) OR TITLE-ABS-KEY ( "Traditional" ) ) AND ( TITLE-ABS-KEY ( "Cystectomy" ) OR TITLE-ABS-KEY ( "Radical bladder" ) OR TITLE-ABS-KEY ( "Cystoprostatectomy" ) OR TITLE-ABS-KEY ( "Bladder surgery" ) OR TITLE-ABS-KEY ( "Bladder Removal" ) ) AND ( TITLE-ABS-KEY ( "Random Allocation" ) OR TITLE-ABS-KEY ( "random allocation" ) OR TITLE-ABS-KEY ( "control* clinic* trial" ) OR TITLE-ABS-KEY ( "control* trial" ) OR TITLE-ABS-KEY ( "RCT" ) OR TITLE-ABS-KEY ( "random*" ) OR TITLE-ABS-KEY ( "Compar*" ) OR TITLE-ABS-KEY ( "Trial" ) )</p> |
| Cochrane Library<br>(2023-04) | <p>1. Robot* [OR]<br/> 2. Robotical [OR]<br/> 3. Robotic [OR]<br/> 4. Robot Assisted [OR]<br/> 5. Robot-Assisted [OR]<br/> 6. Minimally invasive [OR]</p> <p>[AND]</p> <p>7. Open [OR]<br/> 8. Conventional [OR]<br/> 9. Classic [OR]<br/> 10. Classical [OR]<br/> 11. Traditional [OR]</p> <p>[AND]</p> <p>12. Cystectomy [OR]<br/> 13. Radical bladder [OR]<br/> 14. Cystoprostatectomy [OR]</p>                                                                                                                                                                                                                                                                                                                                                                                                                                                                                                                                                                                                                                                                                                                                                                                                                                                              |

|                                                                                |                                                                                                                                                                                                                                                                                                                                                                                                                                                                                                                                                                                                                                                                                                           |
|--------------------------------------------------------------------------------|-----------------------------------------------------------------------------------------------------------------------------------------------------------------------------------------------------------------------------------------------------------------------------------------------------------------------------------------------------------------------------------------------------------------------------------------------------------------------------------------------------------------------------------------------------------------------------------------------------------------------------------------------------------------------------------------------------------|
|                                                                                | <p>15. Bladder surgery [OR]<br/>16. Bladder Removal [OR]</p> <p>[AND]</p> <p>17. Random Allocation<br/>18. random allocation<br/>19. “control* clinic* trial”<br/>20. “control* trial”<br/>21. RCT<br/>22. random*<br/>23. Compar*<br/>24. Trial</p> <p>((“Robot*” OR “Robotical” OR “Robotic” OR “Robot Assisted” OR “Robot-Assisted” OR “Minimally invasive”) AND (“Open” OR “Conventional” OR “Classic” OR “Classical” OR “Traditional”) AND (“Cystectomy” OR “Radical bladder” OR “Cystoprostatectomy” OR “Bladder surgery” OR “Bladder Removal”) AND (“Random Allocation” OR “random allocation” OR “control* clinic* trial” OR “control* trial” OR “RCT” OR “random*” OR “Compar*” OR “Trial”))</p> |
| <p>Clinical Trial<br/>gov<br/>(www.clinical<br/>trials.gov/)<br/>(2023-04)</p> | <p>1.Robotic   Bladder Cancer   Cystectomy   Adult, Older Adult</p>                                                                                                                                                                                                                                                                                                                                                                                                                                                                                                                                                                                                                                       |

Supplementary Table S2 .Prisma Flow-Chart

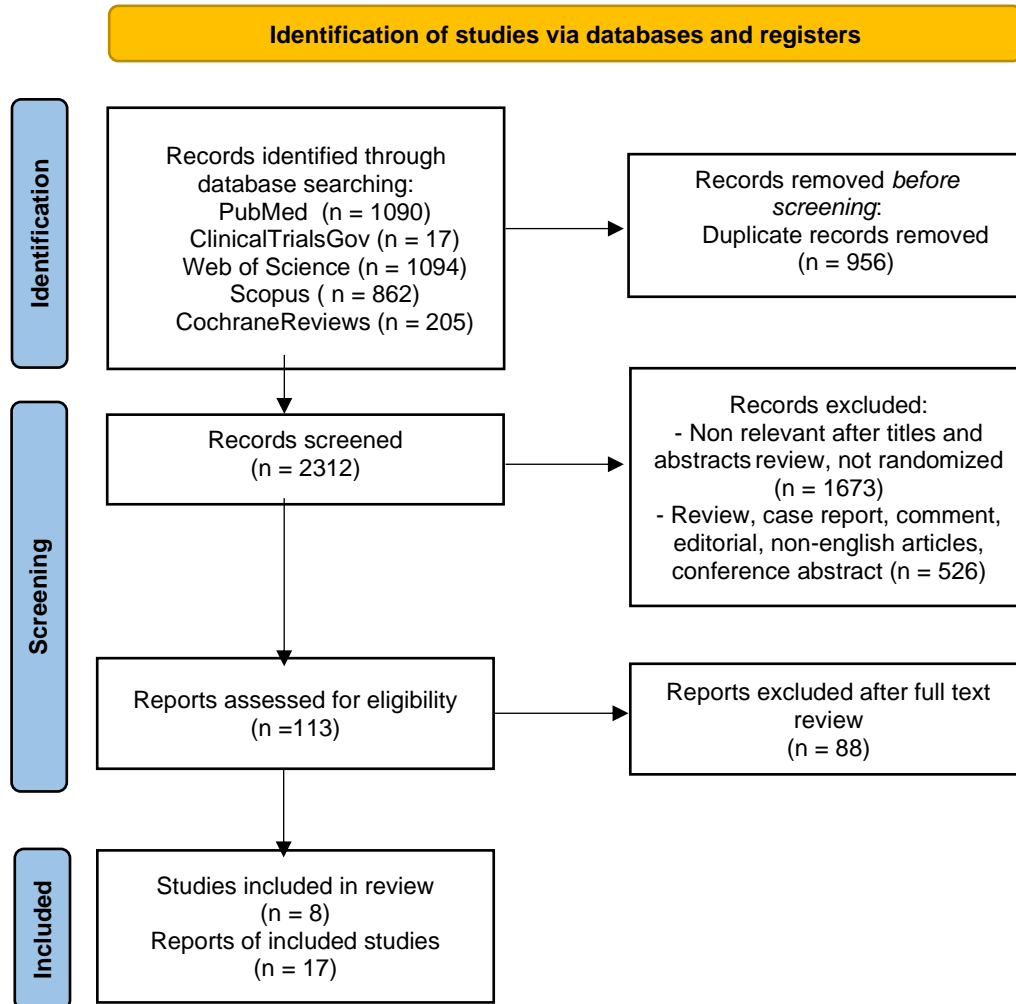

Supplementary Figure S1. Risk of bias Assessment and results – Perioperative Outcomes

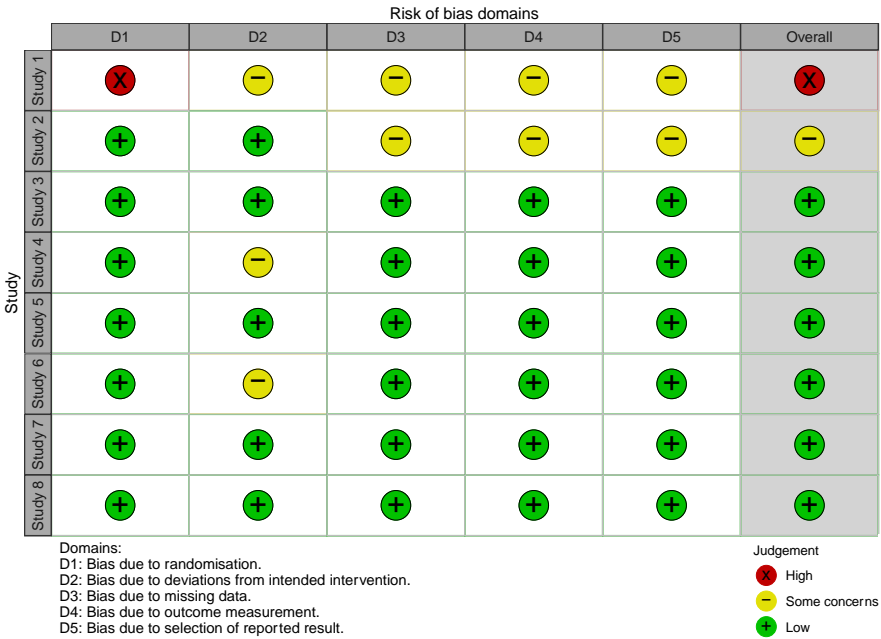

|         |                           |
|---------|---------------------------|
| Study 1 | Nix et al. (2010)         |
| Study 2 | Parekh et al. (2013)      |
| Study 3 | Bochner et al. (2015)     |
| Study 4 | Khan et al. (2016)        |
| Study 5 | Parekh et al. (2018)      |
| Study 6 | Catto et al. (2022)       |
| Study 7 | Mastroianni et al. (2022) |
| Study 8 | Maibom et al. (2022)      |

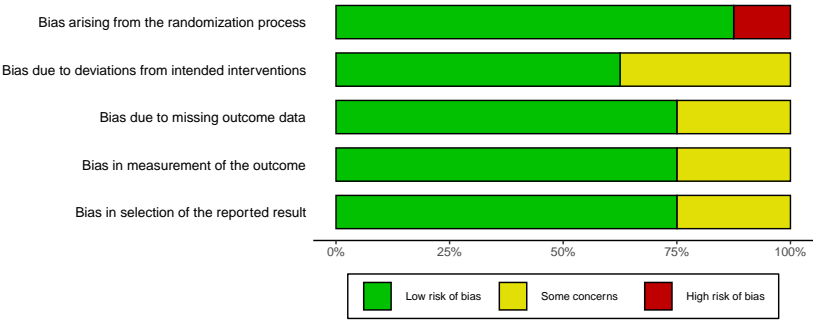

Supplementary Figure S2. Risk of bias Assessment and results – Quality of Life

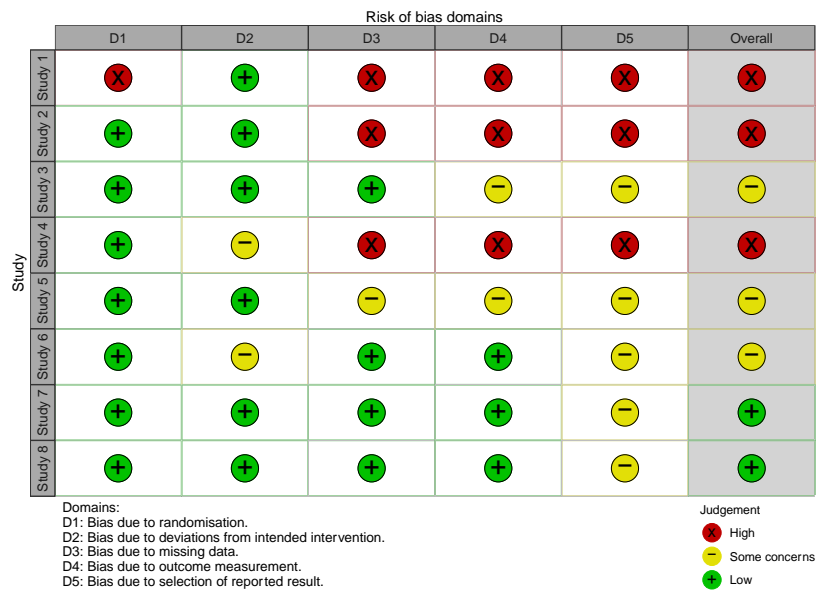

|         |                           |
|---------|---------------------------|
| Study 1 | Nix et al. (2010)         |
| Study 2 | Parekh et al. (2013)      |
| Study 3 | Bochner et al. (2015)     |
| Study 4 | Khan et al. (2016)        |
| Study 5 | Parekh et al. (2018)      |
| Study 6 | Catto et al. (2022)       |
| Study 7 | Mastroianni et al. (2022) |
| Study 8 | Maibom et al. (2022)      |

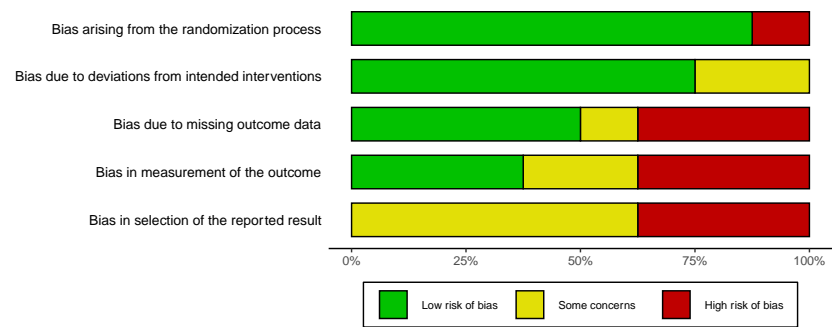

Supplement: s1 [file s1]
